# Supplementary material for: Prediction of VEGF-C as a Key Target of Pure Total Flavonoids From Citrus Against NAFLD in Mice via Network Pharmacology
Source: Front Pharmacol. 2019 Jun 4;10:582. doi: 10.3389/fphar.2019.00582 (PMC6558193; doi:10.3389/fphar.2019.00582)
Supplement: Supplementary file 8 [file Table_8.xls]

## Sheet: Sheet1
Table S8. Information of gene modules of co-expressed DEGs.
NAFLD progression group			PTFC treatment group
Gene_symbol	Color		Gene_symbol	Color
1190002F15RIK	grey		1190002F15RIK	grey
1500015O10RIK	grey		1500015O10RIK	grey
1700022A21RIK	yellow		1700111E14RIK	blue
1700039E15RIK	yellow		1700112E06RIK	turquoise
1700055D18RIK	brown		1700113H08RIK	blue
1700112E06RIK	turquoise		1810011H11RIK	grey
1700113H08RIK	yellow		1810011O10RIK	grey
1700123I01RIK	yellow		1810033B17RIK	grey
1810011H11RIK	turquoise		1810055G02RIK	blue
1810011O10RIK	grey		2010001M06RIK	grey
1810033B17RIK	turquoise		2010003K11RIK	grey
2010001M06RIK	grey		2210013O21RIK	green
2010003K11RIK	grey		2300003K06RIK	blue
2210010C04RIK	yellow		2310040G24RIK	grey
2210013O21RIK	turquoise		3110070M22RIK	grey
2310008H04RIK	black		3300002A11RIK	blue
2310040G24RIK	brown		3930402G23RIK	blue
2610528J11RIK	brown		4632428N05RIK	turquoise
2810408M09RIK	grey		4922501C03RIK	turquoise
3110070M22RIK	grey		4930483J18RIK	blue
3930402G23RIK	yellow		4930503L19RIK	grey
4430402I18RIK	brown		4930578I07RIK	blue
4632428N05RIK	red		4930579D07RIK	blue
4922501C03RIK	black		4932415G12RIK	yellow
4930503L19RIK	grey		4933406P04RIK	blue
4932415G12RIK	grey		5031414D18RIK	green
4933406P04RIK	yellow		5430435G22RIK	green
5031414D18RIK	turquoise		5830411N06RIK	blue
5430435G22RIK	turquoise		6330416G13RIK	grey
6330416G13RIK	turquoise		8430408G22RIK	grey
6430548M08RIK	grey		9130409I23RIK	grey
6430573F11RIK	yellow		A230006K03RIK	blue
8430408G22RIK	grey		A330050F15RIK	blue
9130409I23RIK	grey		AA467197	red
9430083A17RIK	yellow		AB124611	brown
A230006K03RIK	yellow		AF251705	yellow
AA467197	turquoise		AI413582	brown
AB124611	blue		AI836003	blue
AF251705	turquoise		AW112010	brown
AI413582	grey		AATK	grey
AW112010	grey		ABCC1	green
AATK	grey		ABCC4	grey
ABCA2	brown		ABCC5	grey
ABCC1	turquoise		ABCG1	yellow
ABCC4	grey		ABCG3	brown
ABCC5	grey		ABR	turquoise
ABCG1	red		ACAP1	grey
ABCG3	turquoise		ACER2	grey
ABCG5	brown		ACOT1	blue
ABCG8	brown		ACOT2	blue
ABHD1	yellow		ACOT5	blue
ABI3BP	brown		ACSBG1	turquoise
ABR	turquoise		ACSL4	green
ACAP1	grey		ACSS1	brown
ACER2	green		ACTN1	grey
ACOT5	yellow		ACTRT2	blue
ACSBG1	turquoise		ACVRL1	turquoise
ACSL4	grey		ACY3	grey
ACSS1	turquoise		ADAM11	grey
ACTN1	green		ADAM15	green
ACTR3B	brown		ADAM19	red
ACVRL1	turquoise		ADAM8	grey
ACY3	brown		ADAMDEC1	turquoise
ADAM11	grey		ADAMTS19	blue
ADAM15	grey		ADAMTS2	grey
ADAM19	turquoise		ADAMTS7	grey
ADAM8	grey		ADAMTS9	grey
ADAMDEC1	blue		ADAMTSL2	black
ADAMTS19	yellow		ADAP1	brown
ADAMTS2	grey		ADM	grey
ADAMTS7	brown		ADORA2A	turquoise
ADAMTSL2	green		ADRA2A	blue
ADAP1	turquoise		ADRB2	turquoise
ADCK3	brown		ADRBK2	brown
ADCY7	turquoise		AGTRAP	turquoise
ADM	red		AIF1	brown
ADRA2A	yellow		AIM1L	grey
ADRA2B	grey		AK1	grey
ADRB2	blue		AK7	grey
ADRBK2	turquoise		AKAP2	grey
AGTRAP	red		AKNA	brown
AGXT	yellow		AKR1B10	yellow
AGXT2L1	yellow		AKT3	yellow
AIDA	grey		ALDH18A1	brown
AIF1	turquoise		ALDH3B1	turquoise
AIM1L	grey		ALOX5AP	turquoise
AK1	grey		AMDHD1	blue
AK7	grey		AMER2	grey
AKAP2	black		AMICA1	grey
AKNA	turquoise		AMZ1	brown
AKR1B10	turquoise		ANGPTL2	green
AKT3	turquoise		ANKRD13D	grey
ALCAM	brown		ANKRD37	grey
ALDH18A1	turquoise		ANKRD44	black
ALDH3A2	grey		ANKRD55	blue
ALDH3B1	red		ANO6	yellow
ALDOC	yellow		ANTXR1	grey
ALOX5AP	blue		ANXA1	black
AMDHD1	yellow		ANXA2	green
AMER2	grey		ANXA3	black
AMICA1	turquoise		ANXA5	brown
AMZ1	turquoise		AP1S3	turquoise
ANGPTL2	grey		APAF1	turquoise
ANKRD44	grey		APOA4	grey
ANO6	red		APOL11B	grey
ANTXR1	grey		APP	grey
ANXA1	red		AQP8	red
ANXA2	green		ARHGAP11A	grey
ANXA3	blue		ARHGAP15	brown
ANXA5	grey		ARHGAP19	grey
AP1S3	grey		ARHGAP22	red
APAF1	blue		ARHGAP25	yellow
APC2	yellow		ARHGAP26	grey
APOL11B	grey		ARHGAP30	brown
APP	grey		ARHGAP31	black
AQP8	turquoise		ARHGAP4	red
ARHGAP11A	grey		ARHGAP44	grey
ARHGAP15	turquoise		ARHGAP9	turquoise
ARHGAP22	grey		ARHGDIB	brown
ARHGAP25	blue		ARHGEF16	grey
ARHGAP26	brown		ARHGEF2	brown
ARHGAP30	turquoise		ARHGEF6	brown
ARHGAP31	red		ARL11	grey
ARHGAP4	red		ARL4C	turquoise
ARHGAP44	black		ARL5C	red
ARHGAP9	turquoise		ARL6	grey
ARHGDIB	turquoise		ARMCX1	black
ARHGEF16	grey		ARRB1	black
ARHGEF2	turquoise		ARRDC3	turquoise
ARHGEF6	turquoise		ART3	green
ARL4C	blue		ARVCF	grey
ARL5C	turquoise		ASAH1	turquoise
ARL6	grey		ASB18	blue
ARMCX1	black		ASB2	grey
ARRB1	grey		ASB4	yellow
ARRDC1	grey		ATAD2	grey
ARRDC3	grey		ATF3	grey
ART3	red		ATG4A	grey
ARVCF	grey		ATP10D	blue
ASAH1	grey		ATP2A3	grey
ASB2	turquoise		ATP8A1	black
ASB4	red		ATP8B2	green
ASNS	yellow		ATP8B5	grey
ATAD2	black		ATPIF1	grey
ATG4A	grey		AXL	turquoise
ATP10D	yellow		B230217C12RIK	turquoise
ATP2A3	blue		B4GALT5	grey
ATP8A1	green		B4GALT6	yellow
ATP8B2	turquoise		BC024582	grey
ATP8B5	brown		BC028528	yellow
AXL	blue		BANK1	brown
AYM1	yellow		BASP1	green
B230120H23RIK	brown		BATF	brown
B230217C12RIK	grey		BATF2	brown
B3GNT9	grey		BATF3	turquoise
B4GALT5	grey		BCL2	grey
B4GALT6	red		BEND4	turquoise
BC024582	brown		BGN	green
BC028528	blue		BIN2	grey
BANK1	turquoise		BLNK	grey
BASP1	turquoise		BMP5	grey
BATF	turquoise		BMYC	grey
BATF2	turquoise		BST1	grey
BATF3	blue		BST2	grey
BCL11B	turquoise		BTBD11	turquoise
BCL2	grey		BTK	turquoise
BEND4	red		BUB1B	turquoise
BGN	grey		C130050O18RIK	blue
BIN2	turquoise		C1QA	yellow
BLNK	green		C1QB	yellow
BMP5	grey		C1QC	yellow
BMYC	black		C1QTNF7	grey
BST1	grey		C330027C09RIK	blue
BST2	grey		C3AR1	yellow
BTBD11	red		CACNA2D2	blue
BTBD19	yellow		CACNB3	grey
BTK	turquoise		CALHM2	turquoise
BUB1B	blue		CAP1	brown
C1QA	blue		CAPG	brown
C1QB	blue		CAPNS1	grey
C1QC	turquoise		CAR14	grey
C1QTNF7	grey		CARD11	grey
C3AR1	blue		CASC4	grey
CABYR	yellow		CASC5	grey
CACNA2D1	grey		CASP1	turquoise
CACNB3	grey		CBLN4	blue
CALHM2	blue		CBR3	grey
CAP1	turquoise		CCBE1	black
CAPG	turquoise		CCDC102A	turquoise
CAPNS1	grey		CCDC109B	turquoise
CAPRIN2	brown		CCDC138	grey
CAR8	black		CCDC148	yellow
CARD11	turquoise		CCDC3	grey
CASC4	grey		CCDC37	blue
CASC5	grey		CCDC88A	green
CASP1	blue		CCDC88B	red
CASP7	brown		CCL2	grey
CBR3	grey		CCL22	grey
CCBE1	green		CCL3	grey
CCDC102A	red		CCL4	grey
CCDC109B	blue		CCL5	brown
CCDC138	brown		CCL6	yellow
CCDC148	red		CCL7	grey
CCDC3	blue		CCL9	red
CCDC37	yellow		CCNE2	blue
CCDC88A	grey		CCNG1	yellow
CCDC88B	turquoise		CCR1	grey
CCL2	grey		CCR2	grey
CCL22	grey		CCR5	yellow
CCL3	grey		CCR7	red
CCL4	grey		CD101	red
CCL5	turquoise		CD14	turquoise
CCL7	grey		CD180	brown
CCL9	grey		CD200R1	turquoise
CCM2L	brown		CD247	red
CCNA2	grey		CD274	red
CCND2	grey		CD300E	yellow
CCNG1	brown		CD300LB	green
CCR1	grey		CD300LD	yellow
CCR2	turquoise		CD34	grey
CCR5	turquoise		CD3D	turquoise
CCR7	turquoise		CD44	yellow
CCRN4L	yellow		CD48	yellow
CD101	turquoise		CD5	red
CD180	turquoise		CD52	brown
CD2	turquoise		CD53	yellow
CD247	turquoise		CD5L	turquoise
CD274	turquoise		CD6	red
CD28	grey		CD63	grey
CD300E	blue		CD68	yellow
CD300LB	turquoise		CD69	red
CD300LD	turquoise		CD7	brown
CD34	grey		CD72	yellow
CD3D	turquoise		CD74	brown
CD44	blue		CD83	grey
CD48	turquoise		CD84	turquoise
CD5	turquoise		CD86	red
CD52	turquoise		CD8B1	grey
CD53	turquoise		CD93	grey
CD5L	blue		CD97	brown
CD6	turquoise		CDC14A	turquoise
CD63	red		CDC42EP3	green
CD68	turquoise		CDCA5	grey
CD69	turquoise		CDCA7L	red
CD7	turquoise		CDH5	yellow
CD72	blue		CDK14	turquoise
CD74	turquoise		CDK5R1	green
CD84	grey		CDK5R2	blue
CD86	turquoise		CDS1	turquoise
CD8B1	turquoise		CEACAM16	grey
CD93	grey		CENPF	blue
CD97	grey		CEP110	blue
CDC14A	grey		CEP192	turquoise
CDC42EP3	grey		CEP250	red
CDC42EP5	yellow		CEP55	grey
CDCA5	grey		CERK	yellow
CDCA7L	turquoise		CFD	grey
CDH5	red		CFP	turquoise
CDK14	blue		CH25H	red
CDK5R1	blue		CHCHD6	grey
CDKN3	grey		CHST14	turquoise
CDS1	blue		CHST7	grey
CENPC1	brown		CIDEA	grey
CENPH	grey		CIITA	brown
CENPJ	brown		CKAP4	grey
CEP110	yellow		CKB	brown
CEP192	grey		CKLF	grey
CEP250	turquoise		CLDN7	blue
CEP55	grey		CLEC10A	turquoise
CERK	red		CLEC1B	turquoise
CFD	grey		CLEC2G	turquoise
CFP	blue		CLEC4A3	turquoise
CH25H	grey		CLEC4D	red
CHCHD6	grey		CLEC4F	yellow
CHST14	red		CLEC4N	yellow
CHST7	green		CLEC7A	turquoise
CIITA	turquoise		CLEC9A	turquoise
CKAP4	green		CLIC1	turquoise
CKB	turquoise		CLIP2	grey
CKLF	grey		CLRN1	grey
CLDN7	yellow		CLSTN2	brown
CLEC10A	turquoise		CMPK2	grey
CLEC1B	blue		CMTM3	grey
CLEC4A1	yellow		CNKSR1	blue
CLEC4A3	turquoise		CNN2	brown
CLEC4D	grey		COL11A2	blue
CLEC4F	blue		COL14A1	brown
CLEC4N	blue		COL1A2	turquoise
CLEC7A	blue		COL3A1	grey
CLEC9A	turquoise		COL4A1	green
CLIC1	red		COL5A1	green
CLIP2	grey		COL6A1	grey
CLRN1	grey		COL6A3	green
CLSTN2	grey		COLEC11	green
CMPK2	grey		CORO1A	red
CMTM3	grey		COTL1	turquoise
CNN2	turquoise		COX8B	grey
COL11A2	yellow		CPE	grey
COL14A1	grey		CPNE2	grey
COL1A2	blue		CRAT	blue
COL3A1	blue		CRIP1	green
COL4A1	blue		CRISPLD2	grey
COL5A1	grey		CRTAP	grey
COL6A1	grey		CRYAB	turquoise
COL6A3	grey		CRYBA4	yellow
COL8A1	grey		CRYGN	red
COLEC11	grey		CRYM	grey
CORO1A	turquoise		CSF1R	yellow
COTL1	blue		CSF2RA	green
CPE	turquoise		CSF2RB	yellow
CPNE2	black		CSF2RB2	yellow
CRIP1	blue		CSF3R	green
CRISPLD2	grey		CST13	blue
CRTAP	grey		CTBP2	grey
CRYAB	black		CTLA2B	yellow
CRYBA4	turquoise		CTSC	turquoise
CRYM	grey		CTSS	yellow
CSF1R	turquoise		CTSW	grey
CSF2RA	turquoise		CTTNBP2NL	turquoise
CSF2RB	turquoise		CTXN3	blue
CSF2RB2	turquoise		CX3CR1	green
CSF3R	turquoise		CXCL1	grey
CST13	yellow		CXCL2	grey
CST3	black		CXCL9	brown
CTBP2	grey		CXCR3	brown
CTLA2B	blue		CXCR4	brown
CTSC	red		CXCR6	turquoise
CTSS	blue		CYB561	grey
CTSW	turquoise		CYBA	yellow
CTTNBP2NL	red		CYBB	turquoise
CTXN3	yellow		CYGB	green
CX3CR1	turquoise		CYP1B1	grey
CXCL1	green		CYP20A1	grey
CXCL9	grey		CYP26A1	grey
CXCR3	turquoise		CYP2B10	blue
CXCR4	turquoise		CYP2B9	grey
CXCR6	turquoise		CYP4F16	turquoise
CYB561	grey		CYP4F18	brown
CYBA	turquoise		CYS1	grey
CYBB	turquoise		CYTH4	turquoise
CYGB	grey		CYTIP	grey
CYP1A1	brown		D330045A20RIK	red
CYP1B1	grey		D630039A03RIK	grey
CYP26A1	brown		D930048N14RIK	grey
CYP26C1	yellow		DAAM2	grey
CYP2B19	yellow		DAPP1	turquoise
CYP2B9	brown		DCAF4	grey
CYP4F16	blue		DCN	grey
CYP4F18	turquoise		DDR1	grey
CYP4F39	yellow		DDR2	turquoise
CYS1	brown		DDX58	turquoise
CYTH4	turquoise		DDX60	red
CYTIP	turquoise		DEFB1	grey
D630037F22RIK	grey		DEFB45	blue
D630039A03RIK	black		DERL3	grey
D930048N14RIK	black		DKK3	black
DAAM2	grey		DNAJB13	grey
DANCR	yellow		DNASE1L1	turquoise
DAPP1	blue		DNASE1L3	grey
DCAF4	grey		DOCK2	turquoise
DCN	grey		DOK2	turquoise
DCT	yellow		DPEP2	turquoise
DDR1	green		DPT	grey
DDR2	red		DPYSL2	turquoise
DDX58	black		DRAM1	red
DDX60	grey		DSE	yellow
DEFB1	grey		DUSP2	turquoise
DENND2D	grey		DUSP6	grey
DERL3	green		DYNLL1	turquoise
DEXI	brown		DYRK3	grey
DFNA5	brown		E030018B13RIK	blue
DKK3	red		E230029C05RIK	yellow
DMBT1	yellow		EBI3	turquoise
DNAJB13	blue		EDA2R	grey
DNASE1L1	black		EDNRA	brown
DNASE1L3	brown		EFEMP1	turquoise
DNPH1	brown		EFEMP2	grey
DOCK2	turquoise		EFNB2	grey
DOK2	turquoise		EGR2	turquoise
DPT	grey		EHBP1L1	turquoise
DPYSL2	red		EHD2	green
DRAM1	turquoise		EHD3	grey
DSCC1	yellow		EHD4	yellow
DSE	grey		EID2	grey
DUSP6	brown		EIF4E3	turquoise
DUSP8	yellow		EIF5A2	blue
DYNLL1	green		ELF4	brown
DYRK3	black		ELMO2	blue
DZANK1	black		EMILIN1	green
E130012A19RIK	yellow		EMILIN2	yellow
E230029C05RIK	turquoise		EMP1	green
EBI3	blue		EMP3	green
EDA2R	grey		EMR1	yellow
EDNRA	grey		EMR4	yellow
EFEMP1	black		ENTPD1	grey
EFEMP2	grey		EPB4.1L3	yellow
EFNB2	green		EPHA7	turquoise
EGR2	blue		EPSTI1	brown
EHBP1L1	turquoise		ESCO2	grey
EHD2	grey		ESM1	yellow
EHD3	green		ESR2	brown
EHD4	blue		ESYT1	turquoise
EID2	grey		ETS1	black
EIF4E3	grey		ETV5	black
EIF5A2	yellow		EVC	grey
ELF4	turquoise		EVI2A	brown
ELOVL3	yellow		EVL	turquoise
EMILIN1	grey		EVX2	blue
EMILIN2	blue		EXOC3L4	turquoise
EMP1	grey		EXOC4	grey
EMP3	turquoise		F13A1	grey
EMR1	blue		F630028O10RIK	green
EMR4	blue		FABP2	grey
ENPP5	grey		FABP4	black
ENTPD1	turquoise		FADS3	grey
EPB4.1L3	blue		FAM104A	grey
EPHA7	red		FAM105A	turquoise
EPSTI1	turquoise		FAM124A	grey
ESCO2	brown		FAM129B	black
ESM1	grey		FAM149A	grey
ESYT1	grey		FAM172A	yellow
ETS1	grey		FAM180A	grey
ETV5	black		FAM189B	grey
EVC	grey		FAM19A4	blue
EVI2A	turquoise		FAM209	blue
EVL	blue		FAM217B	grey
EXOC3L4	turquoise		FAM229B	yellow
EXOC4	grey		FAM26E	turquoise
F13A1	grey		FAM26F	brown
F2R	brown		FAM46C	grey
F630028O10RIK	turquoise		FAM47E	grey
FABP2	brown		FAM49A	turquoise
FABP4	grey		FAM65B	black
FADS3	grey		FAM73A	grey
FAM104A	turquoise		FAM78A	turquoise
FAM105A	blue		FAM83A	grey
FAM124A	grey		FAM83F	grey
FAM129B	red		FAR1	grey
FAM149A	brown		FASTK	grey
FAM167A	grey		FBLIM1	green
FAM172A	grey		FBLN5	green
FAM180A	grey		FBN1	green
FAM189B	grey		FBXW5	black
FAM209	yellow		FCER1G	brown
FAM217B	grey		FCGR1	yellow
FAM222A	yellow		FCGR2B	grey
FAM229B	grey		FCGR3	yellow
FAM26E	blue		FCGR4	yellow
FAM26F	turquoise		FERMT3	yellow
FAM46C	grey		FEZF2	blue
FAM47E	brown		FGD2	turquoise
FAM65B	black		FGL2	turquoise
FAM73A	green		FHAD1	grey
FAM78A	blue		FHL1	yellow
FAR1	grey		FHOD1	grey
FASTK	turquoise		FILIP1L	brown
FBLIM1	turquoise		FLI1	yellow
FBLN5	grey		FLNA	turquoise
FBN1	turquoise		FLRT2	grey
FBXW5	black		FLT3	turquoise
FCER1G	turquoise		FMO9	blue
FCGR1	blue		FNIP2	grey
FCGR2B	grey		FOLR2	yellow
FCGR3	blue		FOS	grey
FCGR4	turquoise		FPR1	grey
FERMT3	turquoise		FPR2	turquoise
FGD2	turquoise		FRG1	grey
FGL2	turquoise		FRK	grey
FHAD1	grey		FRMD4A	turquoise
FHL1	grey		FRZB	green
FHOD1	brown		FSTL1	turquoise
FILIP1L	turquoise		FUT8	grey
FLI1	blue		FXYD5	brown
FLNA	red		FYB	turquoise
FLRT2	grey		G6PDX	red
FLT3	turquoise		GABRA3	grey
FLYWCH1	black		GABRB3	grey
FNDC5	grey		GABRG3	blue
FNIP2	green		GADD45A	grey
FOLR2	grey		GADD45B	blue
FOXM1	grey		GADD45G	blue
FPR1	blue		GAL3ST1	grey
FPR2	turquoise		GALNT10	turquoise
FRG1	grey		GALNT6	turquoise
FRK	black		GAPT	blue
FRMD4A	red		GAS7	grey
FRZB	blue		GATM	black
FSIP1	yellow		GATSL2	grey
FSTL1	blue		GBP1	brown
FUT8	brown		GBP2	brown
FXYD5	turquoise		GBP3	turquoise
FYB	turquoise		GBP7	grey
G6PDX	turquoise		GBP9	turquoise
GABBR2	brown		GCK	grey
GABRA3	blue		GCNT1	brown
GABRB3	brown		GCSAM	turquoise
GADD45A	grey		GDF10	green
GALNT10	red		GDF2	grey
GALNT6	blue		GDPD1	turquoise
GAS7	brown		GDPD5	black
GATM	grey		GEM	black
GATSL2	grey		GFRA2	turquoise
GBP1	turquoise		GGTA1	black
GBP2	grey		GIMAP3	brown
GBP3	grey		GINS2	grey
GBP7	grey		GJA1	grey
GBP9	grey		GJA10	turquoise
GCK	brown		GLB1L2	blue
GCNT1	turquoise		GLIPR1	turquoise
GCSAM	turquoise		GLIPR2	red
GDF10	grey		GLIS2	black
GDF2	grey		GLP1R	blue
GDPD5	grey		GLS	black
GEM	green		GLTP	green
GFRA2	blue		GM10510	blue
GGTA1	blue		GM10554	grey
GHR	brown		GM11545	turquoise
GIMAP3	grey		GM12250	brown
GIMAP4	grey		GM12298	blue
GIMAP8	grey		GM12359	blue
GINS2	turquoise		GM12695	blue
GJA1	grey		GM13237	grey
GJA10	blue		GM13889	black
GJC3	yellow		GM1673	brown
GLB1L2	yellow		GM20755	blue
GLIPR1	blue		GM21098	blue
GLIPR2	turquoise		GM2848	grey
GLIS2	green		GM4841	grey
GLS	green		GM5086	grey
GLTP	turquoise		GM5887	grey
GM10804	yellow		GM6268	blue
GM11545	blue		GM8995	turquoise
GM12250	turquoise		GM9763	blue
GM12695	yellow		GM9999	blue
GM13237	red		GMDS	grey
GM13889	green		GMFG	yellow
GM16495	yellow		GNAS	green
GM1673	grey		GNG10	brown
GM5086	grey		GNG2	turquoise
GM5420	yellow		GNGT2	yellow
GM5431	grey		GOLM1	grey
GM5887	brown		GPAT2	green
GM6471	yellow		GPC6	yellow
GM8995	blue		GPIHBP1	black
GM9763	yellow		GPM6B	brown
GM9883	yellow		GPNMB	green
GMDS	grey		GPR114	red
GMFG	turquoise		GPR124	black
GNAS	grey		GPR128	blue
GNG10	grey		GPR141	red
GNG2	turquoise		GPR160	grey
GNGT2	turquoise		GPR171	brown
GOLM1	brown		GPR18	red
GPAT2	grey		GPR64	grey
GPC6	blue		GPR84	grey
GPIHBP1	green		GPR98	grey
GPM6B	turquoise		GPRASP2	blue
GPNMB	grey		GPSM3	brown
GPR114	turquoise		GPX3	grey
GPR124	red		GPX8	black
GPR128	yellow		GRAMD1B	grey
GPR135	yellow		GRK1	black
GPR141	turquoise		GSDMD	green
GPR160	grey		GSN	grey
GPR171	turquoise		GSTM3	grey
GPR18	turquoise		GSTM4	grey
GPR50	yellow		GUCA1A	grey
GPR64	grey		GUCY1B3	green
GPR84	grey		GZMA	grey
GPR98	grey		GZMB	grey
GPSM3	turquoise		GZMN	blue
GPX3	grey		H2-AA	turquoise
GPX6	yellow		H2-AB1	turquoise
GPX8	grey		H2-DMA	turquoise
GRAMD1B	grey		H2-DMB1	red
GRIN2B	yellow		H2-EB1	brown
GRK1	grey		H2-M2	red
GRK5	brown		H2-M3	brown
GSDMD	grey		H2-OB	grey
GSN	grey		H2-T24	yellow
GSTM3	grey		HADHA	blue
GSTM4	grey		HAP1	grey
GUCA1A	brown		HAUS8	grey
GUCY1B3	grey		HAVCR2	yellow
GZMA	turquoise		HCK	turquoise
GZMB	grey		HCLS1	brown
H2-AA	blue		HCST	yellow
H2-AB1	turquoise		HDAC9	brown
H2-DMA	turquoise		HDC	grey
H2-DMB1	turquoise		HERC6	grey
H2-EB1	turquoise		HEYL	grey
H2-M2	turquoise		HHAT	blue
H2-M3	turquoise		HIC1	turquoise
H2-OB	turquoise		HIP1	black
H2-T24	blue		HIST1H2AO	grey
HACL1	yellow		HK2	brown
HAP1	grey		HK3	turquoise
HAUS8	grey		HLX	grey
HAVCR2	turquoise		HMGN3	turquoise
HCK	turquoise		HMHA1	turquoise
HCLS1	turquoise		HMOX1	black
HCST	turquoise		HMX1	blue
HDAC9	grey		HOXB2	grey
HDC	red		HOXB3	blue
HEATR5B	black		HPGDS	black
HERC6	grey		HPSE	grey
HEYL	turquoise		HSPA1A	grey
HIC1	green		HSPA1B	grey
HIP1	red		HSPA1L	blue
HIP1R	yellow		HTRA1	turquoise
HIST1H2AO	grey		HVCN1	brown
HIST1H2BB	yellow		I830012O16RIK	brown
HK2	turquoise		ICA1	yellow
HK3	turquoise		ICAM1	turquoise
HLX	grey		ICAM2	black
HMCN1	grey		ICOS	turquoise
HMGN3	grey		ICOSL	red
HMMR	grey		IER3	grey
HMOX1	red		IER5	red
HOXA3	grey		IFI203	yellow
HOXB2	red		IFI204	yellow
HPSE	turquoise		IFI27L2A	turquoise
HSCB	grey		IFI27L2B	grey
HSD17B6	brown		IFI30	red
HSD17B7	yellow		IFI44	turquoise
HSPA1A	grey		IFI47	brown
HSPA1B	grey		IFIH1	grey
HSPA1L	yellow		IFIT1	grey
HTRA1	grey		IFIT2	yellow
HUNK	yellow		IFITM2	grey
HVCN1	turquoise		IFITM3	yellow
I830012O16RIK	grey		IFITM6	yellow
ICA1	grey		IFNGR1	turquoise
ICAM1	blue		IFT57	red
ICAM2	green		IGFBP1	blue
ICOS	turquoise		IGFBP3	green
ICOSL	turquoise		IGFBP7	black
IDS	brown		IGSF6	brown
IER3	grey		IGTP	grey
IER5	grey		IKBKE	grey
IFI203	grey		IKZF1	brown
IFI204	blue		IL10RA	grey
IFI27L2A	turquoise		IL10RB	green
IFI27L2B	grey		IL16	turquoise
IFI30	grey		IL17F	blue
IFI35	brown		IL17RD	turquoise
IFI44	grey		IL18BP	turquoise
IFI47	grey		IL1A	grey
IFIH1	grey		IL1F9	grey
IFIT1	grey		IL1R2	turquoise
IFIT2	blue		IL20RB	grey
IFITM2	black		IL33	turquoise
IFITM3	grey		IL34	grey
IFITM6	blue		IL3RA	grey
IFNGR1	red		IL7R	grey
IFT57	blue		INPP5D	turquoise
IGFBP2	yellow		IP6K2	grey
IGFBP3	blue		IQGAP1	turquoise
IGFBP7	green		IRAK3	turquoise
IGSF6	turquoise		IRF1	blue
IGTP	grey		IRF5	grey
IKBKE	grey		IRF7	grey
IKZF1	turquoise		IRF8	turquoise
IL10RA	turquoise		IRF9	yellow
IL10RB	turquoise		IRGM1	grey
IL16	grey		IRS2	blue
IL18BP	blue		IRS4	blue
IL1A	grey		ISG15	red
IL1F9	grey		ITGA4	brown
IL20RB	grey		ITGA8	grey
IL33	grey		ITGA9	green
IL3RA	grey		ITGAE	grey
IL7R	blue		ITGAX	turquoise
INHBB	grey		ITGB2	brown
INPP5D	blue		ITGB7	turquoise
IP6K2	black		ITM2A	grey
IQGAP1	turquoise		ITM2C	brown
IRAK3	red		ITPR3	grey
IRF2	brown		ITPRIP	grey
IRF5	grey		JAK3	brown
IRF7	grey		JDP2	grey
IRF8	blue		KBTBD11	brown
IRF9	black		KCNAB2	grey
IRGM1	grey		KCNJ10	turquoise
IRS2	yellow		KCNJ2	red
IRS4	yellow		KCNK13	green
ISG15	grey		KCNK2	turquoise
ITGA4	turquoise		KCNK6	turquoise
ITGA8	brown		KCTD12	yellow
ITGA9	grey		KCTD17	grey
ITGB2	turquoise		KDM2A	turquoise
ITGB7	turquoise		KDM5C	blue
ITM2A	grey		KIF15	grey
ITM2C	grey		KIF21B	brown
ITPR3	grey		KIF23	grey
ITPRIP	green		KITL	turquoise
JAK3	grey		KLF2	grey
JDP2	grey		KLF6	turquoise
JUN	yellow		KLHDC7A	grey
KBTBD11	grey		KLHL36	grey
KCNAB2	turquoise		KLK9	blue
KCNJ10	turquoise		KLRA17	turquoise
KCNJ2	green		KLRA2	turquoise
KCNK13	turquoise		KLRB1	red
KCNK2	grey		KLRD1	green
KCNK6	red		KLRE1	grey
KCTD11	black		KRT6A	blue
KCTD12	blue		KRTAP11-1	blue
KCTD17	grey		LOC101056128	blue
KDM2A	turquoise		LOC101056336	grey
KIF15	grey		LAIR1	turquoise
KIF21B	turquoise		LAMA2	yellow
KIF23	grey		LAMB1	green
KITL	turquoise		LAMC2	turquoise
KLF2	grey		LAPTM5	brown
KLF4	grey		LCE1L	blue
KLF6	blue		LCK	red
KLHDC7A	brown		LCN2	brown
KLHL36	brown		LCP2	turquoise
KLRA2	blue		LGALS1	grey
KLRB1	turquoise		LGMN	yellow
KLRD1	turquoise		LHFP	turquoise
KLRE1	red		LHX6	grey
KNTC1	grey		LIFR	black
LAIR1	turquoise		LILRA5	turquoise
LAMA2	grey		LILRB4	turquoise
LAMB1	grey		LIMD2	brown
LAMC2	red		LIMK1	grey
LAPTM5	turquoise		LMO3	blue
LCE1L	yellow		LOXL2	grey
LCK	turquoise		LPAR1	grey
LCN2	blue		LPXN	turquoise
LCORL	yellow		LRAT	grey
LCP2	turquoise		LRMP	turquoise
LEAP2	brown		LRRC25	brown
LGALS1	grey		LRRC32	grey
LGSN	grey		LRRC33	green
LHFP	red		LRRK2	grey
LHX6	brown		LSP1	grey
LILRA5	blue		LST1	turquoise
LILRB4	blue		LTB	red
LIMD2	grey		LTBP3	grey
LIMK1	grey		LUM	grey
LIMS1	brown		LXN	turquoise
LIN7A	brown		LY6D	grey
LMO3	yellow		LY6E	brown
LOXL2	grey		LY6G6E	grey
LPAR1	green		LY6G6F	blue
LPXN	grey		LY75	grey
LRAT	black		LY86	yellow
LRMP	turquoise		LYL1	turquoise
LRP11	brown		LYVE1	grey
LRRC14B	brown		LYZ1	yellow
LRRC25	grey		MAFF	grey
LRRC32	grey		MAMDC2	grey
LRRC33	turquoise		MAML2	blue
LRRC63	yellow		MAN1C1	yellow
LRRK2	grey		MAP2K6	grey
LSP1	grey		MAP3K8	grey
LST1	turquoise		MAP4K1	grey
LTB	turquoise		MAPRE2	black
LTBP3	grey		MARCKS	yellow
LUM	grey		MARCKSL1	grey
LXN	blue		MARCO	grey
LY6E	grey		MATN2	grey
LY6G6E	blue		MBP	grey
LY6G6F	yellow		MCL1	black
LY75	green		MCM3	grey
LY86	turquoise		MCM5	grey
LYN	grey		MCM6	grey
LYPD6	yellow		MCOLN2	grey
LYVE1	red		MECOM	grey
LYZ1	turquoise		MEFV	turquoise
MAD2L1	brown		MEIOB	brown
MAFF	brown		MEIS3	grey
MAGEH1	brown		MEST	turquoise
MAMDC2	grey		METRNL	green
MAN1C1	blue		METTL15	grey
MAP2K6	brown		MFSD2A	blue
MAP3K8	blue		MFSD7A	grey
MAP4	brown		MGAT4A	turquoise
MAP4K1	turquoise		MICAL1	turquoise
MAPRE2	green		MICALL2	black
MARCKS	blue		MID1IP1	grey
MARCKSL1	grey		MIR139	blue
MARCO	turquoise		MLEC	grey
MARVELD3	yellow		MLKL	grey
MATN2	red		MMP2	grey
MBD1	brown		MMP23	turquoise
MBP	brown		MMP27	turquoise
MCL1	grey		MPEG1	yellow
MCM2	brown		MRC2	grey
MCM3	green		MS4A4A	grey
MCM4	brown		MS4A4C	brown
MCM5	black		MS4A4D	grey
MCM6	black		MS4A6C	brown
MCOLN2	turquoise		MS4A6D	grey
MDK	yellow		MS4A7	yellow
MEFV	turquoise		MSANTD3	grey
MEIOB	grey		MSC	grey
MEIS3	grey		MSMP	blue
MEST	grey		MSN	turquoise
METRNL	turquoise		MSR1	turquoise
METTL15	grey		MSRB3	grey
MFSD7A	brown		MTHFD1L	grey
MGST3	brown		MUSTN1	grey
MICAL1	turquoise		MVB12B	grey
MICALL2	grey		MX1	brown
MID1IP1	brown		MXRA7	turquoise
MIR139	yellow		MXRA8	turquoise
MLEC	brown		MYL12B	yellow
MLF1IP	yellow		MYO1F	brown
MLKL	grey		MYO1G	turquoise
MMP2	grey		MYO5A	turquoise
MMP23	grey		MYO9A	turquoise
MOSPD2	black		MYO9B	grey
MPEG1	blue		NAALAD2	brown
MR1	grey		NAGK	grey
MRC2	blue		NAIP2	turquoise
MS4A1	grey		NAIP5	turquoise
MS4A4C	turquoise		NAIP6	turquoise
MS4A4D	grey		NANS	grey
MS4A6C	turquoise		NAV1	grey
MS4A6D	turquoise		NBEA	grey
MS4A7	turquoise		NCAPG2	yellow
MSANTD3	grey		NCF1	turquoise
MSC	red		NCF4	brown
MSN	blue		NCKAP1L	brown
MSR1	blue		NCKAP5L	grey
MSRB3	grey		NCS1	black
MTFR2	yellow		NEDD9	brown
MTHFD1L	grey		NELL2	grey
MTHFD2	grey		NES	grey
MUSTN1	turquoise		NEURL1B	grey
MVB12B	grey		NFAM1	brown
MX1	turquoise		NFKB2	red
MXRA7	green		NFKBIE	brown
MXRA8	red		NFKBIZ	grey
MYL12B	grey		NIACR1	grey
MYLIP	green		NID1	green
MYO1F	turquoise		NIN	black
MYO1G	turquoise		NIPA1	brown
MYO5A	blue		NKG7	brown
MYO9A	blue		NLRP1A	blue
MYZAP	grey		NLRP1B	red
NAAA	grey		NLRP4G	blue
NAALAD2	brown		NMI	turquoise
NAGK	grey		NOS2	brown
NAIP2	grey		NPAS2	grey
NAIP5	blue		NPC2	turquoise
NAIP6	red		NR0B2	grey
NAV1	grey		NR1H5	grey
NBEA	grey		NTN1	grey
NCAPG2	blue		NTRK2	grey
NCF1	blue		NTSR2	blue
NCF4	turquoise		NUCB2	grey
NCKAP1L	turquoise		NUP62CL	grey
NCKAP5L	grey		NUPR1	grey
NCOA7	turquoise		NXPE2	grey
NCS1	grey		NXPE3	turquoise
NDN	black		NXPE4	grey
NECAB1	brown		OAS2	grey
NEDD9	turquoise		OIT3	grey
NELL2	grey		OLFML3	turquoise
NES	brown		OLFR1044	blue
NEURL1B	turquoise		OLFR1167	blue
NFAM1	turquoise		OLFR1339	blue
NFKB2	grey		OLFR1510	blue
NFKBIE	turquoise		OLFR446	blue
NIACR1	turquoise		OLFR64	blue
NID1	grey		OLFR655	blue
NIN	blue		OLFR744	blue
NIPA1	grey		OLFR770	blue
NIPAL1	yellow		OLFR835	blue
NKG7	turquoise		OLR1	grey
NLRP1B	turquoise		OSBPL3	grey
NMI	grey		OST4	grey
NMRAL1	brown		OTOGL	blue
NOS2	turquoise		OXCT1	turquoise
NPAS2	brown		P2RX1	blue
NPC2	red		P2RX3	blue
NR0B2	brown		P2RY10	red
NR1H5	grey		P2RY12	turquoise
NRN1	brown		P2RY6	brown
NTN1	brown		PACS1	red
NUCB2	blue		PADI2	brown
NUPR1	grey		PALM	grey
NXPE2	brown		PAM	brown
NXPE3	turquoise		PAMR1	green
NXPE4	turquoise		PANX1	green
OAS2	blue		PAPOLB	blue
OGG1	brown		PARP14	turquoise
OLFML3	turquoise		PARP8	turquoise
OLFR1016	yellow		PARVB	turquoise
OLFR1361	yellow		PBX4	grey
OLFR1427	yellow		PCDH17	yellow
OLFR1490	yellow		PCDHB4	blue
OLFR446	yellow		PCOLCE	green
OLFR64	yellow		PDCL2	blue
OLFR648	yellow		PDE1A	grey
OST4	brown		PDE4A	grey
OTOGL	yellow		PDE4B	blue
OXCT1	blue		PDE5A	grey
P2RY10	turquoise		PDGFB	black
P2RY12	blue		PDGFRA	grey
P2RY6	turquoise		PDGFRB	grey
PACS1	red		PDGFRL	grey
PADI2	turquoise		PDIA6	grey
PALLD	black		PDK4	blue
PALM	grey		PDLIM1	yellow
PAM	grey		PDLIM2	yellow
PAMR1	grey		PDZD11	grey
PANX1	turquoise		PEA15B	blue
PAPSS1	brown		PER2	black
PARD3B	yellow		PER3	blue
PARP14	grey		PF4	black
PARP8	turquoise		PFKFB3	grey
PARVB	red		PFKFB4	brown
PBX4	grey		PGM1	black
PCDH17	blue		PGR	blue
PCOLCE	brown		PHF11D	grey
PCP4L1	brown		PHLDA3	grey
PDE1A	grey		PHLDB1	black
PDE4A	green		PIGB	grey
PDE5A	green		PIK3CD	turquoise
PDGFRA	blue		PIK3CG	turquoise
PDGFRB	red		PIK3R5	turquoise
PDGFRL	brown		PIK3R6	turquoise
PDIA3	brown		PILRA	brown
PDIA6	brown		PION	brown
PDLIM1	grey		PIP4K2A	brown
PDLIM2	blue		PITPNM1	grey
PDP2	yellow		PKM	turquoise
PDZD11	grey		PKP3	grey
PEG3	yellow		PLA2G15	turquoise
PER2	black		PLA2G7	yellow
PER3	yellow		PLAC8	turquoise
PF4	grey		PLAGL1	grey
PFKFB3	black		PLAUR	turquoise
PFKFB4	turquoise		PLCG2	brown
PGM1	green		PLCXD3	blue
PGR	yellow		PLD4	turquoise
PHF11D	grey		PLEK	turquoise
PHLDA3	grey		PLEKHG1	grey
PHLDB1	black		PLEKHO1	turquoise
PIGB	black		PLEKHO2	brown
PIK3CD	turquoise		PLGRKT	turquoise
PIK3CG	turquoise		PLSCR1	black
PIK3R5	blue		PLSCR2	black
PILRA	turquoise		PLXNA1	grey
PION	brown		PLXND1	turquoise
PIP4K2A	turquoise		PMEL	blue
PITPNM1	grey		PMEPA1	turquoise
PKM	turquoise		PMP22	yellow
PKP3	grey		PODNL1	red
PLA2G15	grey		POLA1	grey
PLA2G4A	blue		POLD1	grey
PLA2G7	turquoise		POLR3GL	brown
PLAC8	blue		POU2F2	green
PLAGL1	brown		PPAP2A	grey
PLAUR	grey		PPFIA4	turquoise
PLCG2	turquoise		PPIC	grey
PLCXD3	yellow		PPM1H	yellow
PLD4	blue		PPM1J	green
PLEK	turquoise		PPM1M	yellow
PLEKHF1	brown		PPP1R14A	grey
PLEKHG1	green		PPP1R18	turquoise
PLEKHO1	blue		PPP1R1B	grey
PLEKHO2	turquoise		PPP1R2-PS9	blue
PLGRKT	grey		PPP1R9B	green
PLK4	brown		PQLC3	brown
PLSCR1	green		PRAF2	grey
PLXNA1	grey		PRCP	brown
PLXND1	grey		PRDM1	turquoise
PMEPA1	blue		PRELP	green
PMP22	blue		PRG4	turquoise
POLA1	black		PRICKLE2	black
POLR3GL	grey		PRIM1	turquoise
POU2F2	turquoise		PRKAR2B	red
PPFIA4	turquoise		PRKCB	turquoise
PPIC	grey		PRMT2	grey
PPM1H	turquoise		PROCR	red
PPM1J	red		PROSAPIP1	brown
PPM1M	grey		PRPMP5	blue
PPP1R14A	black		PRR5L	grey
PPP1R18	blue		PRSS23	green
PPP1R1B	brown		PRSS33	blue
PPP1R9B	grey		PSD4	turquoise
PRAF2	brown		PSMB10	grey
PRCP	turquoise		PSMB8	brown
PRDM1	turquoise		PSMB9	brown
PRELP	grey		PSTPIP1	red
PRG4	grey		PTGIR	grey
PRICKLE2	green		PTGIS	turquoise
PRIM1	black		PTGS1	black
PRKAR2B	grey		PTGS2	red
PRKCB	blue		PTK2B	grey
PRMT2	grey		PTPLAD2	brown
PROCR	turquoise		PTPN18	turquoise
PROSAPIP1	turquoise		PTPN22	brown
PRPMP5	yellow		PTPRC	brown
PRPS2	brown		PTPRE	grey
PRR5L	grey		PTPRO	turquoise
PRSS23	grey		PXDN	black
PRSS32	yellow		PYCR2	grey
PSMB10	grey		PYHIN1	turquoise
PSMB7	grey		RAB11FIP5	turquoise
PSMB8	grey		RAB19	red
PSMB9	grey		RAB20	brown
PSMD9	yellow		RAB30	blue
PSPC1	yellow		RAB31	turquoise
PSTPIP1	turquoise		RAB39	brown
PTGFRN	grey		RAB42	grey
PTGIS	red		RAB8B	yellow
PTGS1	blue		RABL5	yellow
PTK2B	brown		RAD51D	yellow
PTPLAD2	turquoise		RALB	grey
PTPN18	blue		RALGDS	grey
PTPN22	turquoise		RAMP1	grey
PTPRC	turquoise		RAP1GAP2	grey
PTPRO	turquoise		RAPH1	grey
PXDN	green		RARB	grey
PYCR2	black		RASA3	grey
PYGB	grey		RASA4	brown
PYHIN1	blue		RASGRP1	turquoise
RAB11FIP5	red		RASGRP3	grey
RAB19	turquoise		RASIP1	grey
RAB20	brown		RASL11A	grey
RAB31	blue		RBL1	brown
RAB39	turquoise		RBMS3	grey
RAB42	red		RCAN3	turquoise
RAB8B	turquoise		RCN3	brown
RABL5	grey		REEP5	grey
RAD51D	blue		RELB	grey
RALGDS	turquoise		RELL2	grey
RAMP1	grey		RELN	grey
RAP1GAP2	turquoise		RENBP	grey
RAPH1	brown		RERG	grey
RARB	green		RETNLG	grey
RASA3	grey		RFTN1	grey
RASA4	turquoise		RFX6	blue
RASGRP1	turquoise		RGAG4	brown
RASGRP3	grey		RGL1	grey
RASIP1	green		RGS1	turquoise
RASL11A	grey		RGS10	turquoise
RBL1	grey		RGS16	grey
RBMS3	grey		RGS19	brown
RCAN3	blue		RGS3	turquoise
RCN3	grey		RINL	turquoise
RD3	brown		RIPK2	grey
REEP5	grey		RIPK3	brown
REG3D	yellow		RNASE6	turquoise
RELB	turquoise		RNASEL	yellow
RELL2	grey		RNF144B	turquoise
RENBP	green		RNF212	blue
RERG	green		RNF213	turquoise
RFTN1	red		RP2H	grey
RFX6	yellow		RPGR	blue
RGAG4	turquoise		RRAGD	green
RGL1	grey		RS5-8S1	grey
RGS10	turquoise		RTP4	brown
RGS16	grey		RTTN	grey
RGS19	turquoise		RUFY4	grey
RGS3	grey		RUNX3	turquoise
RINL	turquoise		S100A4	red
RIPK3	turquoise		S100A6	red
RNASE6	turquoise		S100A9	grey
RNASEL	blue		SAMD9L	green
RNF144B	black		SAMHD1	grey
RNF213	black		SASH3	turquoise
RP2H	brown		SCD2	red
RRAGD	grey		SCIMP	turquoise
RS5-8S1	grey		SCN1B	grey
RTFDC1	yellow		SDC3	brown
RTP4	grey		SDF2L1	grey
RTTN	green		SDK2	blue
RUNX3	turquoise		SECTM1B	blue
S100A4	blue		SELM	grey
S100A6	turquoise		SELPLG	brown
SAA4	brown		SEMA3D	grey
SAMD9L	grey		SEMA4D	grey
SAMHD1	turquoise		SEMA5B	grey
SAPCD1	yellow		SEMA6D	turquoise
SASH3	turquoise		SEPN1	turquoise
SC4MOL	yellow		SERPINA12	grey
SCAI	brown		SERPINA3F	grey
SCD2	red		SERPINA3G	yellow
SCIMP	blue		SERPINA3N	yellow
SCN1B	grey		SERPINA7	grey
SCYL2	yellow		SERPINB1A	grey
SDC3	turquoise		SERPINB6B	grey
SDF2L1	brown		SERPINB9	brown
SELM	grey		SERPINB9C	blue
SELPLG	turquoise		SERPINE1	grey
SEMA3D	grey		SERPINH1	grey
SEMA4D	turquoise		SGCB	grey
SEMA6D	green		SGCE	grey
SEPN1	turquoise		SH3BGRL3	brown
SERPINA12	grey		SH3BP1	brown
SERPINA3F	turquoise		SH3BP2	grey
SERPINA3G	turquoise		SH3PXD2B	grey
SERPINA7	brown		SHANK2	grey
SERPINB6B	grey		SHC3	blue
SERPINB9	grey		SHISA2	grey
SERPINB9C	yellow		SHISA5	brown
SERPINH1	grey		SIGLECH	grey
SFTPA1	yellow		SIM2	grey
SGCB	blue		SIRPA	turquoise
SGCE	grey		SKP2	grey
SH2B2	grey		SLA	yellow
SH3BGRL3	turquoise		SLAIN1	grey
SH3BP1	turquoise		SLAMF7	brown
SH3PXD2B	turquoise		SLAMF8	brown
SHANK2	brown		SLC11A1	yellow
SHISA2	green		SLC13A5	grey
SHISA5	grey		SLC15A3	yellow
SHISA6	yellow		SLC16A13	grey
SIGLECH	grey		SLC16A3	grey
SIRPA	turquoise		SLC16A9	yellow
SKP2	black		SLC17A4	grey
SLA	turquoise		SLC25A24	turquoise
SLAMF7	turquoise		SLC25A25	blue
SLAMF8	turquoise		SLC25A4	yellow
SLC11A1	blue		SLC29A3	turquoise
SLC13A5	grey		SLC2A3	grey
SLC15A3	blue		SLC38A1	green
SLC16A13	green		SLC41A2	grey
SLC16A3	blue		SLC7A7	green
SLC16A9	blue		SLC9A1	black
SLC17A4	brown		SLC9A9	yellow
SLC25A15	yellow		SLCO1A4	blue
SLC25A22	yellow		SLFN2	turquoise
SLC25A4	turquoise		SLFN5	yellow
SLC27A1	yellow		SLMO1	blue
SLC29A3	blue		SLPI	grey
SLC2A3	turquoise		SMAD6	grey
SLC36A1	brown		SMAD9	blue
SLC38A1	turquoise		SMIM3	grey
SLC41A2	brown		SMOC2	grey
SLC7A7	grey		SMPD3	grey
SLC9A1	black		SMPDL3B	grey
SLC9A9	blue		SNAI2	turquoise
SLCO1A4	yellow		SNN	grey
SLFN2	blue		SNTG2	grey
SLFN5	grey		SNX20	turquoise
SLPI	red		SOAT1	brown
SMAD6	grey		SOX4	grey
SMAD9	yellow		SP140	brown
SMIM3	green		SPARC	yellow
SMOC2	black		SPATA6	grey
SMPD3	grey		SPEG	blue
SMPDL3B	turquoise		SPIB	grey
SNAI2	grey		SPIC	turquoise
SNN	grey		SPN	red
SNORA20	yellow		SPNS2	grey
SNORA65	yellow		SPP1	grey
SNTG2	brown		SPRED1	grey
SNX20	blue		SPRR1A	blue
SNX32	brown		SPRY1	grey
SOAT1	turquoise		SPRY3	blue
SOCS5	brown		SREBF1	grey
SOX4	grey		SRGN	turquoise
SP140	turquoise		SRPK2	grey
SPAG5	grey		SSTR5	yellow
SPARC	green		ST6GAL1	grey
SPATA6	turquoise		ST6GALNAC4	red
SPEG	yellow		ST8SIA4	turquoise
SPIB	turquoise		STAB2	yellow
SPIC	blue		STAMBPL1	turquoise
SPN	turquoise		STARD3NL	grey
SPNS2	brown		STAT1	brown
SPP1	grey		STEAP4	grey
SPRED1	black		STK10	grey
SPRY1	brown		STK11	grey
SPRYD7	yellow		STX11	turquoise
SQLE	yellow		SULF1	green
SREBF1	grey		SUSD3	brown
SRGN	blue		SVS3B	blue
SSTR5	turquoise		SYK	brown
ST3GAL5	brown		SYT11	yellow
ST6GAL1	brown		SYT9	turquoise
ST6GALNAC4	turquoise		SYTL2	blue
ST8SIA4	blue		TAGLN2	green
STAB2	grey		TAP1	red
STAMBPL1	blue		TAP2	turquoise
STARD3NL	grey		TAPBPL	turquoise
STAT1	grey		TAS2R107	blue
STEAP4	black		TBC1D10C	grey
STK10	turquoise		TBC1D19	grey
STX11	turquoise		TBC1D4	grey
STXBP6	brown		TBC1D8	blue
SULF1	grey		TBXAS1	turquoise
SUSD3	turquoise		TCF21	grey
SYK	turquoise		TEK	grey
SYT11	grey		TES	grey
SYT9	green		TEX35	blue
SYTL2	yellow		TFPI	yellow
TACC2	yellow		TGFB2	blue
TAF9B	yellow		TGFBI	brown
TAGLN2	turquoise		TGFBR3	black
TAP1	turquoise		THBD	grey
TAP2	blue		THBS1	green
TAPBPL	grey		THBS2	grey
TAS1R2	yellow		THEMIS2	turquoise
TBC1D10C	turquoise		THY1	red
TBC1D19	grey		TIFA	grey
TBC1D4	black		TIFAB	turquoise
TBC1D8	yellow		TIMD4	grey
TBXAS1	blue		TIMP1	grey
TCEA3	brown		TLE1	grey
TCF19	brown		TLE3	grey
TCF21	brown		TLR13	brown
TEK	grey		TLR2	grey
TES	grey		TLR3	grey
TFPI	grey		TLR4	turquoise
TGFBI	grey		TLR6	turquoise
TGFBR3	green		TLR7	yellow
THBD	black		TM6SF1	yellow
THBS1	grey		TMEM159	turquoise
THBS2	grey		TMEM164	green
THEMIS2	blue		TMEM176A	brown
THY1	turquoise		TMEM178	turquoise
TIFA	grey		TMEM2	black
TIFAB	blue		TMEM204	black
TIMD2	brown		TMEM206	turquoise
TIMD4	grey		TMEM221	turquoise
TLE3	brown		TMEM26	turquoise
TLR13	turquoise		TMEM45B	grey
TLR2	blue		TMEM51	grey
TLR3	grey		TMEM61	blue
TLR6	blue		TMEM67	grey
TLR7	turquoise		TMEM86A	green
TM6SF1	blue		TMEM89	grey
TMEM106A	grey		TMEM90A	blue
TMEM11	yellow		TMEM90B	grey
TMEM159	grey		TMSB10	brown
TMEM164	brown		TNFAIP2	grey
TMEM176A	grey		TNFAIP3	grey
TMEM180	brown		TNFAIP8	brown
TMEM2	green		TNFAIP8L2	brown
TMEM206	green		TNFRSF11A	yellow
TMEM221	grey		TNFRSF11B	brown
TMEM237	grey		TNFRSF19	grey
TMEM258	black		TNFRSF21	green
TMEM26	turquoise		TNFRSF26	black
TMEM45B	grey		TNFSF10	grey
TMEM51	grey		TNNI3	red
TMEM67	grey		TNNI3K	blue
TMEM86A	grey		TNXB	black
TMEM90B	grey		TOR4A	brown
TMSB10	turquoise		TPMT	grey
TNFAIP2	grey		TPSAB1	blue
TNFAIP3	grey		TRAF1	red
TNFAIP8	turquoise		TRDN	blue
TNFAIP8L2	turquoise		TREM2	grey
TNFRSF11A	blue		TREM3	grey
TNFRSF11B	grey		TREML2	green
TNFRSF19	brown		TRH	blue
TNFRSF21	blue		TRIM12A	grey
TNFSF10	turquoise		TRIM30D	turquoise
TNNI3	turquoise		TRIM34A	grey
TNXB	green		TRIM35	black
TOP2A	grey		TRIM47	grey
TOR3A	yellow		TRP53I11	grey
TOR4A	turquoise		TRPC4	blue
TPMT	grey		TRPV2	grey
TPSAB1	yellow		TSC22D3	grey
TRAF1	turquoise		TSPAN13	turquoise
TREM2	blue		TSPAN3	red
TREM3	turquoise		TSPAN32	red
TREML2	turquoise		TSPAN7	black
TRH	yellow		TSTD2	grey
TRIM12A	grey		TUBA1A	grey
TRIM30D	grey		TWF2	turquoise
TRIM35	blue		TXK	turquoise
TRIM47	green		TYROBP	yellow
TRP53I11	brown		UBA7	turquoise
TRPC4	yellow		UBD	red
TSC22D1	brown		UBE2L6	grey
TSC22D3	black		UHRF1	grey
TSPAN13	turquoise		UNC5A	grey
TSPAN3	grey		UNC79	blue
TSPAN32	turquoise		UNC93B1	brown
TSPAN7	green		UPP1	grey
TSTD2	grey		UST	grey
TTC21B	brown		UTS2R	blue
TTC8	grey		VASN	grey
TTYH1	yellow		VAT1	grey
TUBA1A	grey		VAV1	brown
TUBA8	yellow		VCAM1	yellow
TUBB5	grey		VEGFC	black
TUSC5	turquoise		VILL	grey
TWF2	blue		VIM	yellow
TXK	blue		VLDLR	grey
TYROBP	turquoise		VMN1R82	blue
UBA7	grey		VSIG4	yellow
UBD	blue		VSTM4	turquoise
UBE2L6	grey		WAS	turquoise
UHRF1	grey		WDFY4	turquoise
UNC93B1	grey		WDYHV1	grey
UPP1	grey		WFDC2	grey
VASN	black		WFDC6A	blue
VAT1	grey		WIPF1	turquoise
VAV1	turquoise		WISP1	grey
VCAM1	blue		WLS	grey
VEGFC	green		WT1	grey
VILL	turquoise		WTIP	grey
VIM	turquoise		XCL1	red
VLDLR	brown		ZBP1	brown
VMN1R45	brown		ZBTB16	blue
VSIG4	grey		ZC2HC1A	grey
VSTM4	grey		ZDHHC19	blue
WAS	turquoise		ZDHHC2	grey
WDFY4	turquoise		ZEB2	grey
WDPCP	brown		ZFP36L3	blue
WDYHV1	grey		ZFP458	blue
WFDC2	grey		ZFP607	blue
WFDC6A	yellow		ZFP784	red
WIPF1	blue		ZFP950	turquoise
WISP1	grey		ZMAT1	grey
WLS	turquoise		ZMYND15	grey
WT1	grey		ZNF41-PS	grey
WTIP	red		ZSCAN18	grey
XCL1	turquoise		ZSWIM6	grey
XDH	grey
ZAP70	yellow
ZBP1	turquoise
ZC2HC1A	grey
ZDHHC2	grey
ZEB2	grey
ZFP354C	black
ZFP386	grey
ZFP455	brown
ZFP784	turquoise
ZFP950	black
ZMAT1	green
ZMYND15	blue
ZNF41-PS	green
ZSCAN18	grey
ZSWIM6	green
